# Supplementary material for: Proposed Framework for the Evaluation of Standalone Corpora Processing Systems: An Application to Arabic Corpora
Source: Hindawi journal article supplement (doi:10.1155/2014/602745), 2014-01-01
Supplement: f1 [file 602745.f1.pdf]

# Appendix A

---

## Main Screen (12 Criteria)

|    |                                                                                                                                          |
|----|------------------------------------------------------------------------------------------------------------------------------------------|
| 1  | The items on the main window are clearly focused on users' key tasks ("featuritis" has been avoided)                                     |
| 2  | Useful content is presented on the main window or within one click of the main window                                                    |
| 3  | The main window shows good examples of real tool features                                                                                |
| 4  | Buttons on the main window begin with the most important keyword (e.g. "Sun holidays" not "Holidays in the sun")                         |
| 5  | Navigation areas on the main window are not over-formatted and users will not mistake them for adverts                                   |
| 6  | Navigation choices are ordered in the most logical or task-oriented manner (with the less important corporate information at the bottom) |
| 7  | All corporate information is grouped in one distinct area (e.g. "About Us")                                                              |
| 8  | By just looking at the main window, the first time user will understand where to start                                                   |
| 9  | The main window shows all the major options                                                                                              |
| 10 | The main window is professionally designed and will create a positive first impression                                                   |
| 11 | The design of the main window will encourage people to explore the tools                                                                 |
| 12 | The main window looks like a main window; pages lower in the site will not be confused with it                                           |

## Task Orientation (25 criteria)

|    |                                                                                              |
|----|----------------------------------------------------------------------------------------------|
| 1  | The tool is free from irrelevant, unnecessary and distracting information                    |
| 2  | Excessive use of scripts, applets, movies, audio files, graphics and images has been avoided |
| 3  | Information is presented in a simple, natural and logical order                              |
| 4  | The number of screens required per task has been minimised                                   |
| 5  | The tool requires minimal scrolling and clicking                                             |
| 6  | The tool correctly anticipates and prompts for the user's probable next activity             |
| 7  | When result are shown, users have access to the actual data (e.g. text data, corpus)         |
| 8  | Users can complete common tasks quickly                                                      |
| 9  | The tool makes the user's work easier and quicker than without the system                    |
| 10 | The user does not need to enter the same information more than once                          |

- 
- |    |                                                                                                                                                                         |
|----|-------------------------------------------------------------------------------------------------------------------------------------------------------------------------|
| 11 | The path for any given task is a reasonable length (2-5 clicks)                                                                                                         |
| 12 | When there are multiple steps in a task, the site displays all the steps that need to be completed and provides feedback on the user's current position in the workflow |
| 13 | Users of the tool do not need to remember information from place to place                                                                                               |
| 14 | The use of metaphors is easily understandable by the typical user                                                                                                       |
| 15 | Details of the software's internal workings are not exposed to the user                                                                                                 |
| 16 | The tool caters for users with little prior experience of the tool                                                                                                      |
| 17 | The tool makes it easy for users to explore the tools and try out different options before committing themselves                                                        |
| 18 | A typical first-time user can do the most common tasks without assistance                                                                                               |
| 19 | When they use the tool again, users will remember how to carry out the key tasks                                                                                        |
| 20 | Action buttons (such as "Submit") are always invoked by the user, not automatically invoked by the system when the last field is completed                              |
| 21 | Command and action items are presented as buttons (not, for example, as hypertext links)                                                                                |
| 22 | When a page presents a lot of information, the user can sort and filter the information                                                                                 |
| 23 | If there is an image on a button or icon, it is relevant to the task                                                                                                    |
| 24 | The tool is robust and all the key features work (i.e. there are no javascript exceptions, CGI errors or broken links)                                                  |
| 25 | The tool supports novice and expert users by providing different levels of explanation (e.g. in help and error messages)                                                |
- 

### **Navigation & IA (18 criteria)**

- 
- |   |                                                                                                                                  |
|---|----------------------------------------------------------------------------------------------------------------------------------|
| 1 | There is a convenient and obvious way to move between related functions and sections and it is easy to return to the main window |
| 2 | The information that users are most likely to need is easy to navigate to from most windows                                      |
| 3 | Navigation choices are ordered in the most logical or task-oriented manner                                                       |
| 4 | The navigation system is broad and shallow (many items on a menu) rather than deep (many menu levels)                            |
| 5 | The Tool structure is simple, with a clear conceptual model and no unnecessary levels                                            |
| 6 | The major sections of the tool are available from every page (persistent navigation) and there are no dead ends                  |
| 7 | Tool bar are located at the top of the window, and look like clickable versions of real-world toolbar                            |
| 8 | There is a help that provides an overview of the tool's content                                                                  |
| 9 | The help is available in every window                                                                                            |
-

|    |                                                                                                                                                  |
|----|--------------------------------------------------------------------------------------------------------------------------------------------------|
| 10 | Good navigational feedback is provided (e.g. showing what you are doing in the tool)                                                             |
| 11 | Category labels accurately describe the information in the category                                                                              |
| 12 | Terminology and conventions (such as link colours) are (approximately) consistent with general tool usage                                        |
| 13 | buttons and tool bar look the same in the different sections of the tool                                                                         |
| 14 | There is a visible change when the mouse points at something clickable (excluding cursor changes)                                                |
| 15 | Navigation-only pages (such as the main window) can be viewed without scrolling                                                                  |
| 16 | There are clearly marked exits on every window allowing the user to bale out of the current task without having to go through an extended dialog |
| 17 | If the tool spawns new windows, these will not confuse the user (e.g. they are dialog-box sized and can be easily closed)                        |
| 18 | Menu instructions, prompts and messages appear on the same place on each screen                                                                  |

### **Forms and Data Entry 16 criteria)**

|    |                                                                                                                                                                         |
|----|-------------------------------------------------------------------------------------------------------------------------------------------------------------------------|
| 1  | Field labels on forms clearly explain what entries are desired                                                                                                          |
| 2  | Text boxes on forms are the right length for the expected answer                                                                                                        |
| 3  | There is a clear distinction between “required” and “optional” fields on forms                                                                                          |
| 4  | Questions on forms are grouped logically, and each group has a heading                                                                                                  |
| 5  | Fields on forms contain hints, examples or model answers to demonstrate the expected input                                                                              |
| 6  | Pull-down menus, radio buttons and check boxes are used in preference to text entry fields on forms (i.e. text entry fields are not overused)                           |
| 7  | With data entry screens, the cursor is placed where the input is needed                                                                                                 |
| 8  | Users can complete simple tasks by entering just essential information (with the system supplying the non-essential information by default)                             |
| 9  | Forms allow users to stay with a single interaction method for as long as possible (i.e. users do not need to make numerous shifts from keyboard to mouse to keyboard). |
| 10 | The user can change default values in form fields                                                                                                                       |
| 11 | Text entry fields indicate the amount and the format of data that needs to be entered                                                                                   |
| 12 | Forms are validated before the form is submitted                                                                                                                        |
| 13 | With data entry screens, the site carries out field-level checking and form-level checking at the appropriate time                                                      |
| 14 | The site makes it easy to correct errors (e.g. when a form is incomplete, positioning the cursor at the location where correction is required)                          |
| 15 | There is consistency between data entry and data display                                                                                                                |

16 Labels are close to the data entry fields (e.g. labels are right justified)

### **Trust and Credibility (8 criteria)**

- 1 The tool is authoritative and trustworthy
- 2 The tool contains third-party support (e.g. citations, testimonials) to verify the accuracy of information.
- 3 It is clear that there is a real organisation behind the tool (e.g. there is a physical address or a photo of the office)
- 4 The company comprises acknowledged experts (look for credentials)
- 5 Each window is clearly branded so that the user knows he is still using the same tool
- 6 The tool is free of typographic errors and spelling mistakes
- 7 The visual design complements the brand and any offline marketing messages
- 8 There are real people behind the organisation and they are honest and trustworthy (look for bios)

### **Writing & Content Quality (14 criteria)**

- 1 Text is concise, with no needless instructions or welcome notes
- 2 windows use bulleted and numbered lists in preference to narrative text
- 3 Lists are prefaced with a concise introduction (e.g. a word or phrase), helping users appreciate how the items are related to one another
- 4 The most important items in a list are placed at the top
- 5 Information is organised hierarchically, from the general to the specific, and the organisation is clear and logical
- 6 windows are quick to scan, with ample headings and sub-headings and short paragraphs
- 7 Each window is clearly labelled with a descriptive and useful title that makes sense as a bookmark
- 8 Buttons and button titles are descriptive and predictive, and there are no “Click here!” buttons
- 9 The tool avoids cute, clever, or cryptic headings
- 10 Button names match the title of destination window, so users will know when they have reached the intended window
- 11 Button labels and link labels start with action words
- 12 Headings and sub-headings are short, straightforward and descriptive
- 13 The words, phrases and concepts used will be familiar to the typical user
- 14 Acronyms and abbreviations are defined when first used

## Page Layout and Visual Design (29 criteria)

|    |                                                                                                                                                                         |
|----|-------------------------------------------------------------------------------------------------------------------------------------------------------------------------|
| 1  | The screen density is appropriate for the target users and their tasks                                                                                                  |
| 2  | The layout helps focus attention on what to do next                                                                                                                     |
| 3  | On all windows, the most important information (such as features and functions) is presented on the first screenful of information (“above the fold”)                   |
| 4  | The tool can be used without scrolling horizontally                                                                                                                     |
| 5  | Things that are clickable (like buttons) are obviously pressable                                                                                                        |
| 6  | Items that aren't clickable do not have characteristics that suggest that they are                                                                                      |
| 7  | The functionality of buttons and controls is obvious from their labels or from their design                                                                             |
| 8  | Clickable images include redundant text labels (i.e. there is no 'mystery meat' navigation)                                                                             |
| 9  | Fonts are used consistently                                                                                                                                             |
| 10 | The relationship between controls and their actions is obvious                                                                                                          |
| 11 | Icons and graphics are standard and/or intuitive (concrete and familiar)                                                                                                |
| 12 | There is a clear visual "starting point" to every window                                                                                                                |
| 13 | Each window of the tool shares a consistent layout                                                                                                                      |
| 14 | Windows of the tool are formatted for printing, or there is a printer-friendly version                                                                                  |
| 15 | Buttons and links show that they have been clicked                                                                                                                      |
| 16 | GUI components (like radio buttons and check boxes) are used appropriately                                                                                              |
| 17 | Fonts are readable                                                                                                                                                      |
| 18 | There is a good balance between information density and use of white space                                                                                              |
| 19 | The tool is pleasant to look at                                                                                                                                         |
| 20 | The tool avoids extensive use of upper case text                                                                                                                        |
| 21 | The tool has a consistent, clearly recognisable look and feel that will engage users                                                                                    |
| 22 | Saturated blue is avoided for fine detail (e.g. text, thin lines and symbols)                                                                                           |
| 23 | Colour is used to structure and group items on the window                                                                                                               |
| 24 | On content windows, line lengths are neither too short (<50 characters per line) nor too long (>100 characters per line) when viewed in a standard browser width window |
| 25 | Windows have been designed to an underlying grid, with items and widgets aligned both horizontally and vertically                                                       |
| 26 | Meaningful labels, effective background colours and appropriate use of borders and white space help users identify a set of items as a discrete functional block        |

- 
- |    |                                                                                                     |
|----|-----------------------------------------------------------------------------------------------------|
| 27 | Individual windows are free of clutter and irrelevant information                                   |
| 28 | Standard elements (such as window titles, tool bar , privacy policy etc.) are easy to locate        |
| 29 | Icons are visually and conceptually distinct yet still harmonious (clearly part of the same family) |
- 

### **Search (12 criteria)**

- 
- |    |                                                                                                                                                                         |
|----|-------------------------------------------------------------------------------------------------------------------------------------------------------------------------|
| 1  | The search results window shows the user what was searched for and it is easy to edit and resubmit the search                                                           |
| 2  | The search results window makes it clear how many results were retrieved, and the number of results per window can be configured by the user                            |
| 3  | If no results are returned, the system offers ideas or options for improving the query based on identifiable problems with the user's input                             |
| 4  | The search engine handles empty queries gracefully                                                                                                                      |
| 5  | The search engine includes templates, examples or hints on how to use it effectively                                                                                    |
| 6  | The search results window does not show duplicate results (either perceived duplicates or actual duplicates)                                                            |
| 7  | The search box is long enough to handle common query lengths                                                                                                            |
| 8  | Searches cover the entire tool, not a portion of it                                                                                                                     |
| 9  | The search box and its controls are clearly labelled (multiple search boxes can be confusing)                                                                           |
| 10 | The scope of the search is made explicit on the search results window and users can restrict the scope (if relevant to the task)                                        |
| 11 | The search results window displays useful meta-information, such as the size of the document, the date that the document was created and the file type (Word, pdf etc.) |
| 12 | The search engine provides automatic spell checking and looks for plurals and synonyms                                                                                  |
- 

### **Help, Feedback and Error Tolerance (24 criteria)**

- 
- |   |                                                                                                             |
|---|-------------------------------------------------------------------------------------------------------------|
| 1 | The FAQ or on-line help provides step-by-step instructions to help users carry out the most important tasks |
| 2 | It is easy to get help in the right form and at the right time                                              |
| 3 | Prompts are brief and unambiguous                                                                           |
| 4 | The user does not need to consult user manuals or other external information to use the tool                |
| 5 | The tool provides good feedback (e.g. progress indicators or messages) when needed                          |
| 6 | Users are given help in choosing functions                                                                  |
| 7 | User confirmation is required before carrying out potentially “dangerous” actions                           |
-

---

(e.g. deleting something)

- 8 Confirmation windows are clear
  - 9 Error messages contain clear instructions on what to do next
  - 10 When the user needs to choose between different options (such as in a dialog box), the options are obvious
  - 11 Error messages are written in a non-derisory tone and do not blame the user for the error
  - 12 Windows load quickly (5 seconds or less)
  - 13 The tool provides immediate feedback on user input or actions
  - 14 When giving instructions, windows tell users what to do rather than what to avoid doing
  - 15 The tool shows users how to do common tasks where appropriate (e.g. with demonstrations of the tool's functionality)
  - 16 The tool provides context sensitive help
  - 17 Help is clear and direct and simply expressed in plain English, free from jargon and buzzwords
  - 18 The tool provides clear feedback when a task has been completed successfully
  - 19 There is sufficient space between targets to prevent the user from hitting multiple or incorrect targets
  - 20 There is a line space of at least 2 pixels between clickable items
  - 21 The tool makes it obvious when and where an error has occurred (e.g. when a form is incomplete, highlighting the missing fields)
  - 22 The tool uses appropriate selection methods (e.g. pull-down menus) as an alternative to typing
  - 23 The tool does a good job of preventing the user from making errors
  - 24 The tool ensures that work is not lost (either by the user or tool error)
  - 25 Error messages are written in plain language with sufficient explanation of the problem
  - 26 When relevant, the user can defer fixing errors until later in the task
  - 27 It is easy to “undo” (or “cancel”) and “redo” actions
-

# Appendix B

---

## User Interface Languages (3 criteria)

- |   |                 |
|---|-----------------|
| 1 | Arabic          |
| 2 | English         |
| 3 | Other Languages |

## Input Text Format (9 criteria)

- |   |                 |
|---|-----------------|
| 1 | TXT             |
| 2 | DOC             |
| 3 | DOCX            |
| 4 | HTML            |
| 5 | HTM             |
| 6 | XML             |
| 7 | RTF             |
| 8 | System Specific |
| 9 | Other           |

## Input Text Encoding (6 criteria)

- |   |              |
|---|--------------|
| 1 | Windows-1252 |
| 2 | UTF          |
| 3 | ASCII        |
| 4 | Cp420        |
| 5 | Mac Arabic   |
| 6 | Other        |



### **Text Preprocessing (4 criteria)**

- 
- |   |                                                    |
|---|----------------------------------------------------|
| 1 | Remove numbers, punctuation and Latin characters,  |
| 2 | Normalization (Diacritics, Alef and Taa Marbutah.) |
| 3 | Stop list                                          |
| 4 | Include list                                       |
- 

### **Single Words Frequency Lists (3 criteria)**

- 
- |   |                                                                               |
|---|-------------------------------------------------------------------------------|
| 1 | Single word frequency for entire corpus                                       |
| 2 | Single word frequency for part of the corpus                                  |
| 3 | Additional single word profiles (Document frequency, Relative Frequency, ...) |
- 

### **N-Gram Frequency Lists (4 criteria)**

- 
- |   |                                                                           |
|---|---------------------------------------------------------------------------|
| 1 | N-grams, Frequency for entire corpus                                      |
| 2 | N-grams, Frequency for part of the corpus                                 |
| 3 | Considering Arabic writing direction                                      |
| 4 | Additional N-Grams profiles (Document frequency, Relative Frequency, ...) |
- 

### **Frequency Profile Comparisons (5 criteria)**

- 
- |   |                                     |
|---|-------------------------------------|
| 1 | <b>across files</b>                 |
| 2 | across folders                      |
| 3 | across different corpora            |
| 4 | different No. of comparison formula |
| 5 | Key words extraction                |
-

### **Concordance (8 criteria)**

|   |                                      |
|---|--------------------------------------|
| 1 | Single word                          |
| 2 | N-grams                              |
| 3 | Citation                             |
| 4 | Character Window type                |
| 5 | Word Window type                     |
| 6 | Window variability                   |
| 7 | Results sorting                      |
| 8 | Considering Arabic writing direction |

### **Collocation (6 criteria)**

|   |                                                 |
|---|-------------------------------------------------|
| 1 | Single word                                     |
| 2 | N-grams                                         |
| 3 | Position                                        |
| 4 | Collocation strength (formula , no. of formula) |
| 5 | Collocation Strength (frequency)                |
| 6 | Considering Arabic writing direction            |

### **Saving Output (6 criteria)**

|   |           |
|---|-----------|
| 1 | TXT       |
| 2 | CSV       |
| 3 | HTML, HTM |
| 4 | XML       |
| 5 | RTF       |
| 6 | Others    |
